# Supplementary material for: Sex Differences and Utility of Treadmill Testing in Long‐QT Syndrome
Source: PubMed Central journal article supplement — J Am Heart Assoc. 2022 Sep 14;11(18):e025108. doi: 10.1161/JAHA.121.025108 (PMC9683668; doi:10.1161/jaha.121.025108), 2022-09-14
Supplement: JAH3-11-e025108-s001.pdf [file JAH3-11-e025108-s001.pdf]

## **SUPPLEMENTAL MATERIAL**

**Table S1. *KCNQ1* and *KCNH2* LP/P Variants**

| <b><i>KCNQ1</i> Variant</b> | <b>N (%)</b> |
|-----------------------------|--------------|
| Total                       | 164 (100)    |
| c.403delG                   | 1 (0.6)      |
| Ala178Thr                   | 1 (0.6)      |
| Ala341Glu                   | 9 (5.5)      |
| Ala344Ala                   | 1 (0.6)      |
| Ala344Val                   | 1 (0.6)      |
| Arg174Leu                   | 1 (0.6)      |
| Arg190Gln                   | 2 (1.2)      |
| Arg195Pro                   | 1 (0.6)      |
| Arg231Cys                   | 1 (0.6)      |
| Arg243Cys                   | 1 (0.6)      |
| Arg259Cys                   | 7 (4.3)      |
| Arg366Trp                   | 3 (1.8)      |
| Arg518*                     | 6 (3.7)      |
| Arg555Gly                   | 1 (0.6)      |
| Arg555His                   | 5 (3.0)      |
| Arg591Cys                   | 1 (0.6)      |
| Arg591His                   | 14 (8.5)     |
| Arg594Gln                   | 2 (1.2)      |
| c.387-5T>A                  | 3 (1.8)      |
| c.477+1G>A                  | 1 (0.6)      |
| c.477+5 G>A                 | 4 (2.4)      |
| Gln505Ter                   | 1 (0.6)      |
| Gln530Ter                   | 3 (1.8)      |
| Glu284Lys                   | 2 (1.2)      |
| Glu284Ter                   | 1 (0.6)      |
| Glu449Argfs*14              | 1 (0.6)      |
| Gly168Arg                   | 4 (7.8)      |
| Gly179Ser                   | 1 (0.6)      |
| Gly269Ser                   | 2 (1.2)      |
| Gly325Arg                   | 4 (2.4)      |
| Gly325Glu                   | 2 (1.2)      |
| Gly589Asp                   | 3 (1.8)      |
| Ile567Thr                   | 1 (0.6)      |
| Leu203Pro                   | 4 (2.4)      |
| Leu266Pro                   | 10 (6.1)     |
| Leu342Phe                   | 1 (0.6)      |
| Lys13Ter                    | 2 (1.2)      |
| Lys362Arg                   | 5 (3.0)      |
| Met159Ile                   | 1 (0.6)      |
| Pro343Leu                   | 1 (0.6)      |
| Ser225Leu                   | 1 (0.6)      |

|                      |              |
|----------------------|--------------|
| Ser277Pro            | 1 (0.6)      |
| Ser546Leu            | 2 (1.2)      |
| Ser566Phe            | 3 (1.8)      |
| Trp305Leu            | 3 (1.8)      |
| Tyr111Cys            | 2 (1.2)      |
| Tyr125Asn            | 2 (1.2)      |
| Tyr315Cys            | 1 (0.6)      |
| Val205Met            | 31 (18.9)    |
| Val254Met            | 2 (1.2)      |
| <b>KCNH2 Variant</b> | <b>N (%)</b> |
| Total                | 51 (100)     |
| Ala614Val            | 1 (2.0)      |
| Arg100Trp            | 1 (2.0)      |
| Arg176Trp            | 3 (5.9)      |
| Arg366*              | 1 (2.0)      |
| Arg534Cys            | 1 (2.0)      |
| Arg582Cys            | 1 (2.0)      |
| Arg784Trp            | 1 (2.0)      |
| Arg823Trp            | 1 (2.0)      |
| Asn633Ser            | 1 (2.0)      |
| Asp259Argfs*73       | 1 (2.0)      |
| Asp501Gly            | 1 (2.0)      |
| c.234_241delTGCCGCGC | 2 (3.9)      |
| c.331_337dupGATGTGG  | 1 (2.0)      |
| c.744dupC            | 1 (2.0)      |
| c.925delC            | 2 (3.9)      |
| Cys984Ter            | 2 (3.9)      |
| Gln376Gln            | 1 (2.0)      |
| Glu929GlyfsTer11     | 5 (9.8)      |
| Gly1036Alafs*21      | 4 (7.8)      |
| Gly1036Alafs*22      | 1 (2.0)      |
| Gly47Asp             | 1 (2.0)      |
| Gly584Ser            | 5 (9.8)      |
| Gly601Ser            | 1 (2.0)      |
| His562Arg            | 1 (2.0)      |
| Leu559Phe            | 1 (2.0)      |
| Ser182*              | 1 (2.0)      |
| Ser818Leu            | 1 (2.0)      |
| Thr613Met            | 1 (2.0)      |
| Tyr43Cys             | 1 (2.0)      |
| Val822Leu            | 1 (2.0)      |

LP indicates Likely-Pathogenic; P, pathogenic

**Table S2. QT Correction for Variant Carriers Using Other Formulas**

|                                  | <b>Framingham</b> | <b>Fredericia</b> | <b>Hodges</b> |
|----------------------------------|-------------------|-------------------|---------------|
| Resting QTc (mean, SD)           | 433 (51)          | 447 (41)          | 446 (41)      |
| Standing QTc (mean, SD)          | 418 (52)          | 451 (43)          | 449 (41)      |
| Peak Exercise QTc (mean, SD)     | 308 (55)          | 411 (60)          | 460 (43)      |
| 1-Minute Recovery QTc (mean, SD) | 348 (59)          | 426 (57)          | 443 (44)      |
| 4-Minute Recovery QTc (mean, SD) | 410 (63)          | 458 (57)          | 457 (47)      |

QTc indicates corrected QT interval

QTc is expressed in ms (milliseconds)

**Table S3. Normative Treadmill Testing QTc in Non-Carriers**

|                       | <b>95<sup>th</sup> percentile</b> |         | <b>98<sup>th</sup> percentile</b> |         |
|-----------------------|-----------------------------------|---------|-----------------------------------|---------|
|                       | Males                             | Females | Males                             | Females |
| Supine QTc            | 455                               | 456     | 465                               | 470     |
| Standing QTc          | 479                               | 495     | 503                               | 519     |
| Peak Exercise QTc     | 519                               | 519     | 557                               | 551     |
| 1-Minute Recovery QTc | 473                               | 495     | 493                               | 564     |
| 4-Minute Recovery QTc | 469                               | 480     | 531                               | 495     |

QTc indicates corrected QT interval  
QTc is expressed in ms (milliseconds)

**Table S4. QTc and HR in Pre-Pubescent vs. Post-Pubescent LQTS Patients**

|                                | <b>Pre-Pubescent<br/>LQTS (N=44)</b> | <b>Post-Pubescent<br/>LQTS (N=164)</b> | <b>p-value*</b> |
|--------------------------------|--------------------------------------|----------------------------------------|-----------------|
| Male (n, %)                    | 22 (50)                              | 65 (40)                                |                 |
| Female (n, %)                  | 22 (50)                              | 99 (60)                                |                 |
| Resting QTc (mean, SD)         | 447 (35)                             | 456 (44)                               | 0.14            |
| Standing QTc (mean, SD)        | 463 (44)                             | 470 (46)                               | 0.42            |
| Peak Exercise QTc (mean, SD)   | 476 (74)                             | 474 (63)                               | 0.71            |
| 1-Min Recovery QTc (mean, SD)  | 456 (47)                             | 476 (62)                               | 0.08            |
| 4- Min Recovery QTc (mean, SD) | 464 (25)                             | 491 (60)                               | <0.001          |

QTc indicates corrected QT interval; HR, heart rate

QTc is expressed in ms (milliseconds); HR is expressed in bpm (beats per minute)

\* Adjusted for familial relatedness and multiple comparisons

**Table S5. QT and HR in Symptomatic vs. Asymptomatic Patients**

|                    | <b>Symptomatic Patients<br/>(N=80)</b> | <b>Asymptomatic<br/>Patients (N=128)</b> | <b>p-value*</b> |
|--------------------|----------------------------------------|------------------------------------------|-----------------|
| Resting QTc        | 462 (52)                               | 450 (33)                                 | 0.20            |
| Resting HR         | 66 (12)                                | 68 (14)                                  | 0.28            |
| Standing QTc       | 472 (54)                               | 467 (38)                                 | 0.64            |
| Standing HR        | 73 (16)                                | 79 (15)                                  | 0.05            |
| Peak Exercise QTc  | 478 (89)                               | 475 (46)                                 | 0.08            |
| Peak Exercise HR   | 144 (27)                               | 148 (25)                                 | 0.29            |
| Min-1 Recovery QTc | 477 (69)                               | 469 (52)                                 | 0.80            |
| Min-1 Recovery HR  | 113 (23)                               | 116 (26)                                 | 0.46            |
| Min-4 Recovery QTc | 498 (64)                               | 477 (50)                                 | 0.02            |
| Min-4 Recovery HR  | 84 (14)                                | 89 (21)                                  | 0.07            |

QTc indicates corrected QT interval; HR, heart rate

QTc is expressed in ms (milliseconds); HR is expressed in bpm (beats per minute)

\*Adjusted for familial relatedness and multiple comparisons

**Table S6. Predictive Utility of Exercise ECG Characteristics\***

|                | Males (N=168) |             |             |             |      |      | Females (N=208) |             |             |             |      |      | P-value |
|----------------|---------------|-------------|-------------|-------------|------|------|-----------------|-------------|-------------|-------------|------|------|---------|
|                | AUC           | Cutoff (ms) | Specificity | Sensitivity | PPV  | NPV  | AUC             | Cutoff (ms) | Specificity | Sensitivity | PPV  | NPV  |         |
| Resting        | 0.82          | 470         | 0.99        | 0.22        | 1    | 0.60 | 0.84            | 480         | 0.96        | 0.27        | 1    | 0.55 | 0.32    |
| Standing       | 0.69          | 417         | 0.51        | 0.81        | 0.50 | 0.79 | 0.76            | 433         | 0.61        | 0.81        | 0.62 | 0.81 | 0.17    |
| Peak Exercise  | 0.66          | 416         | 0.37        | 0.81        | 0.47 | 0.74 | 0.78            | 431         | 0.64        | 0.81        | 0.64 | 0.81 | 0.06    |
| 1-Min Recovery | 0.77          | 410         | 0.56        | 0.81        | 0.57 | 0.81 | 0.85            | 427         | 0.79        | 0.81        | 0.76 | 0.84 | 0.002   |
| 4-Min Recovery | 0.82          | 442         | 0.76        | 0.81        | 0.67 | 0.86 | 0.9             | 452         | 0.87        | 0.81        | 0.79 | 0.84 | 0.22    |

AUC indicates area under the curve; QTc, corrected QT interval; PPV, positive predictive value; NPV, negative predictive value; p-values compare males vs. females

\*Modelling adjusted for age and familial relatedness, and p-values corrected for multiple comparisons



**Table S7. Cut off Values for 4-Minute Recovery QTc at Higher Specificities**

| <b>Specificity</b> | <b>Sex</b> | <b>Cutoff (ms)</b> | <b>Sensitivity</b> | <b>PPV</b> | <b>NPV</b> |
|--------------------|------------|--------------------|--------------------|------------|------------|
| 0.80               | Males      | 445                | 0.86               | 0.73       | 0.85       |
|                    | Females    | 450                | 0.82               | 0.79       | 0.84       |
| 0.90               | Males      | 460                | 0.67               | 0.80       | 0.76       |
|                    | Females    | 463                | 0.60               | 0.85       | 0.76       |
| 0.95               | Males      | 475                | 0.41               | 0.87       | 0.72       |
|                    | Females    | 482                | 0.36               | 0.95       | 0.65       |
| 0.99               | Males      | 586                | 0.02               | 1          | 0.61       |
|                    | Females    | 563                | 0.02               | 1          | 0.55       |

PPV indicates positive predictive value; NPV, negative predictive value; PPV, positive predictive value; NPV, negative predictive value; QTc, corrected QT interval

**Table S8. Applied Cut-Off Values from Original Algorithm\***

|                                       |         | <b>Cut-Off</b> | <b>AUC</b> | <b>Sensitivity</b> | <b>Specificity</b> | <b>PPV</b> | <b>NPV</b> | <b>P-value</b> |
|---------------------------------------|---------|----------------|------------|--------------------|--------------------|------------|------------|----------------|
| <b>Step 1</b><br>(Resting QTc)        | Males   | 470            | 0.82       | 0.22               | 0.99               | 1          | 0.60       | -              |
|                                       | Females | 480            | 0.84       | 0.27               | 0.96               | 1          | 0.55       | -              |
| <b>Step 2</b> (4-Min<br>Recovery QTc) | Males   | 445            | 0.81       | 0.77               | 0.80               | 0.71       | 0.85       | 0.45           |
|                                       | Females |                | 0.87       | 0.86               | 0.76               | 0.74       | 0.88       | 0.77           |
| <b>Step 3</b> (1-Min<br>Recovery QTc) | Males   | 460            | 0.70       | 0.61               | 0.63               | 0.82       | 0.36       | 0.34           |
|                                       | Females |                | 0.85       | 0.76               | 0.97               | 0.98       | 0.46       | 1              |

PPV indicates positive predictive value; NPV, negative predictive value; AUC, area under the curve; QTc, corrected QT interval; p-value compares the predictive value of the original cut off values vs. newly proposed sex-stratified cut off values

\*Modelling adjusted for age and familial relatedness, and p-values corrected for multiple comparisons

**Table S9. p.A341-neighbouring vs. other variant-sites in LQTS1**

|                               | <b>p.A341-Neighbouring</b> | <b>Non-p.A341-Neighbouring</b> | <b>P-value*</b> |
|-------------------------------|----------------------------|--------------------------------|-----------------|
| N                             | 11                         | 152                            |                 |
| Males                         | 5                          | 61                             |                 |
| Females                       | 6                          | 91                             |                 |
| Resting QTc (mean, SD)        | 448 (34)                   | 453 (43)                       | 0.57            |
| Standing QTc (mean, SD)       | 474 (42)                   | 466 (47)                       | 0.57            |
| Peak Exercise QTc (mean, SD)  | 497 (37)                   | 483 (66)                       | 0.09            |
| 1-Min Recovery QTc (mean, SD) | 488 (37)                   | 482 (61)                       | 0.60            |
| 4-Min Recovery QTc (mean, SD) | 461 (17)                   | 486 (61)                       | 0.10            |

QTc indicates corrected QT interval; QTc is expressed in ms (milliseconds)

\*Adjusted for familial relatedness and corrected for multiple comparisons

**Table S10. Pore vs. non-pore variant site in LQTS2**

|                               | <b>Pore</b> | <b>Non-pore</b> | <b>P-value*</b> |
|-------------------------------|-------------|-----------------|-----------------|
| N                             | 11          | 34              |                 |
| Males                         | 8           | 13              |                 |
| Females                       | 3           | 21              |                 |
| Resting QTc (mean, SD)        | 460 (32)    | 458 (45)        | 0.65            |
| Standing QTc (mean, SD)       | 473 (32)    | 479 (39)        | 0.67            |
| Peak Exercise QTc (mean, SD)  | 442 (63)    | 448 (53)        | 0.67            |
| 1-Min Recovery QTc (mean, SD) | 442 (38)    | 432 (35)        | 0.21            |
| 4-Min Recovery QTc (mean, SD) | 491 (32)    | 491 (41)        | 0.26            |

QTc indicates corrected QT interval; QTc is expressed in ms (milliseconds)

\*Adjusted for familial relatedness and corrected for multiple comparisons

**Table S11. Pre- and Post-Beta Blockade QTc and HR at Various Stages of Treadmill Testing in Carriers**

|                               | Carriers       |                 | P-value* |
|-------------------------------|----------------|-----------------|----------|
|                               | Pre-BB (N=122) | Post-BB (N=129) |          |
| Resting QTc (mean, SD)        | 461 (45)       | 449 (37)        | 0.001    |
| Resting HR (mean, SD)         | 71 (13)        | 62 (11)         | <0.001   |
| Standing QTc (mean, SD)       | 478 (52)       | 462 (38)        | 0.01     |
| Standing HR (mean, SD)        | 82 (16)        | 72 (14)         | <0.001   |
| Peak Exercise QTc (mean, SD)  | 480 (76)       | 468 (47)        | 0.20     |
| Peak Exercise HR (mean, SD)   | 155 (25)       | 138 (23)        | <0.001   |
| Min 1 Recovery QTc (mean, SD) | 474 (65)       | 471 (49)        | 0.18     |
| Min 1 Recovery HR (mean, SD)  | 123 (24)       | 105 (22)        | <0.001   |
| Min 4 Recovery QTc (mean, SD) | 488 (65)       | 484 (42)        | 0.10     |
| Min 4 Recovery HR (mean, SD)  | 92 (20)        | 80 (14)         | <0.001   |

BB indicates beta blockade, QTc, corrected QT interval, HR, heart rate

QTc is expressed in ms (milliseconds); HR is expressed in bpm (beats per minute)

\*Corrected for multiple comparisons

**Table S12. Utility of Step 2 and 3 in Male Patients with a Resting QTc < 470ms and in Female Patients with a Resting QTc < 480ms\***

|                    | Males (N=68) |             |             |      |      | Females (N=89) |             |             |      |      |
|--------------------|--------------|-------------|-------------|------|------|----------------|-------------|-------------|------|------|
|                    | AUC          | Specificity | Sensitivity | PPV  | NPV  | AUC            | Specificity | Sensitivity | PPV  | NPV  |
| 4-Min Recovery QTc | 0.82         | 0.75        | 0.80        | 0.66 | 0.85 | 0.87           | 0.83        | 0.80        | 0.79 | 0.84 |
| 1-Min Recovery QTc | 0.69         | 0.38        | 0.71        | 0.84 | 0.21 | 0.87           | 0.83        | 0.75        | 0.95 | 0.42 |

AUC indicates area under the curve; PPV, positive predictive value; NPV, negative predictive value; CI, confidence interval; QTc, corrected QT

\*Adjusted for age and familial relatedness, and p-values corrected for multiple comparisons

**Table S13. Performance of the Algorithm in Beta-Blocker Naïve Patients\***

|                    | Males (N=56) |             |             |      |      | Females (N=66) |             |             |      |      |
|--------------------|--------------|-------------|-------------|------|------|----------------|-------------|-------------|------|------|
|                    | AUC          | Specificity | Sensitivity | PPV  | NPV  | AUC            | Specificity | Sensitivity | PPV  | NPV  |
| Resting QTc        | 0.84         | 0.99        | 0.25        | 1    | 0.71 | 0.89           | 0.99        | 0.30        | 1    | 0.71 |
| 4-Min Recovery QTc | 0.85         | 0.74        | 0.82        | 0.56 | 0.91 | 0.85           | 0.85        | 0.74        | 0.67 | 0.89 |
| 1-Min Recovery QTc | 0.74         | 0.74        | 0.71        | 0.90 | 0.44 | 0.68           | 0.69        | 0.65        | 0.93 | 0.23 |

AUC indicates area under the curve; PPV, positive predictive value; NPV, negative predictive value; CI, confidence interval; QTc, corrected QT

\* Adjusted for age and familial relatedness, and p-values corrected for multiple comparisons

**Figure S1. Density Plot of Resting QTc**

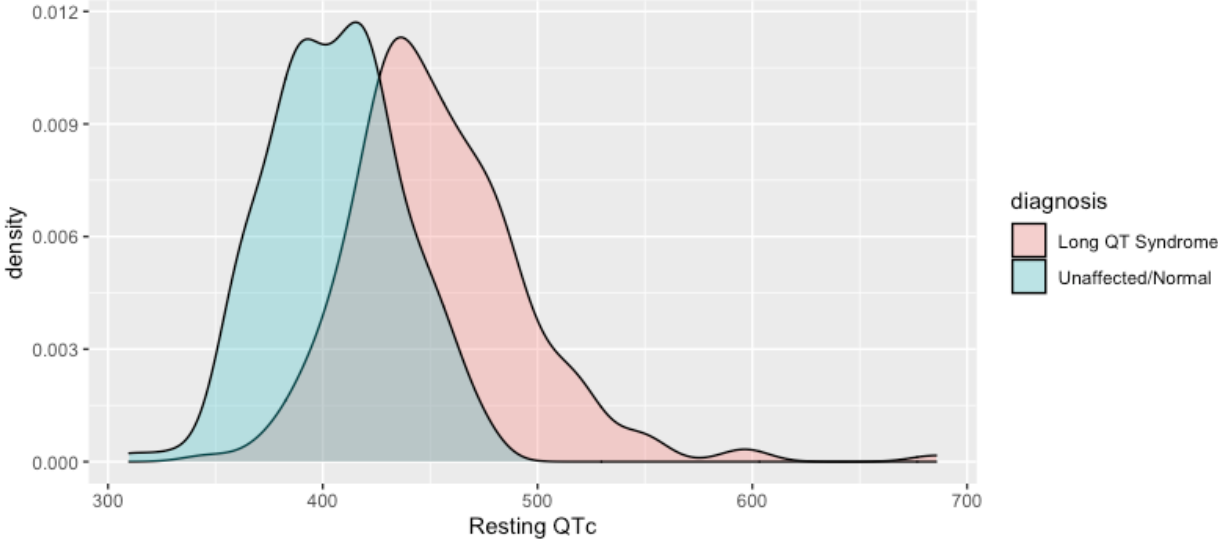

QTc indicates corrected QT interval



**Figure S2. Clinical Application of the Algorithm**

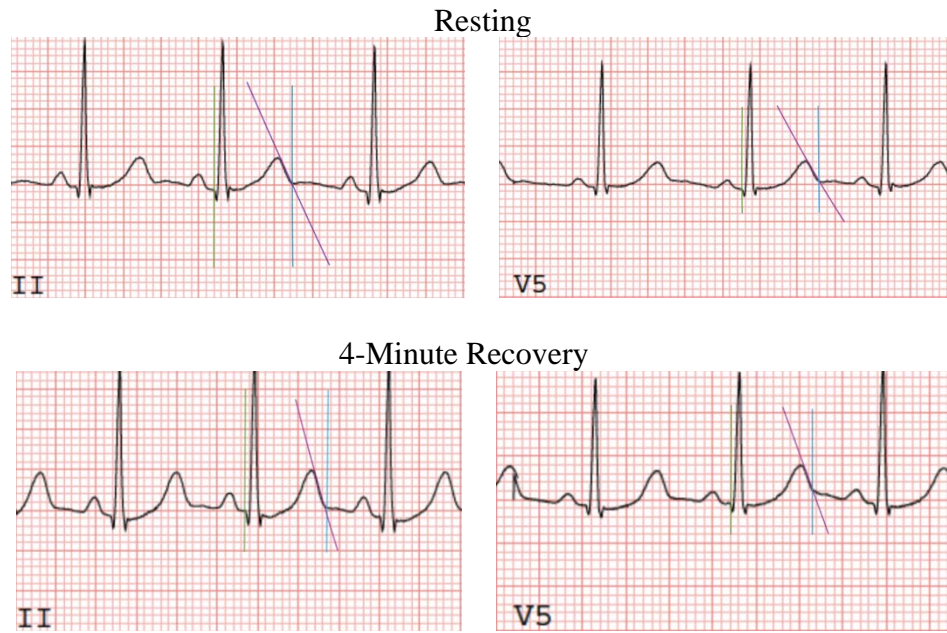

Resting and 4-Minute Recovery strips (Lead II & V5) in an asymptomatic 21-year-old woman with a family history of LQTS who presented with a borderline QT interval of 461ms. The treadmill test showed prolongation of the QT in the 4-minute recovery period at 478ms.
